# Supplementary material
Source: ML conference proceedings conference paper supplement (https://openreview.net/forum?id=hkMoYYEkBoI)
Supplement: supplementary_material [file attachment]

## A ADDITIONAL PROOFS

*Proof of Lemma 8.* We denote  $h^{(t)} := h_{\mathbf{u}^{(t)}, W^{(t)}, b}$ . For every  $j$  we have:

$$\frac{\partial}{\partial \mathbf{u}^{(j)}} L_{f, \mathcal{D}}(h^{(t)}) = \mathbb{E}_{\mathbf{x} \sim \mathcal{D}} \left[ \frac{\partial}{\partial \mathbf{u}^{(j)}} \ell(h^{(t)}(\mathbf{x}), f(\mathbf{x})) \right] = \mathbb{E}_{\mathbf{x} \sim \mathcal{D}} \left[ \sigma(W^{(t)} \mathbf{x}_{j \dots j+k-1}) \ell'(h^{(t)}(\mathbf{x}), f(\mathbf{x})) \right]$$

Therefore:

$$\left\| \frac{\partial}{\partial \mathbf{u}^{(j)}} L_{f, \mathcal{D}}(h^{(t)}) \right\| \leq \mathbb{E}_{\mathbf{x} \sim \mathcal{D}} \left[ \left\| \sigma(W^{(t)} \mathbf{x}_{j \dots j+k-1}) \right\| \right] \leq c\sqrt{q}$$

And from the updates of gradient-descent we have:

$$\left\| \mathbf{u}^{(t,j)} \right\| = \left\| \eta \sum_{t=1}^T \frac{\partial}{\partial \mathbf{u}^{(j)}} L_{f, \mathcal{D}}(h^{(t)}) \right\| \leq \eta \sum_{t=1}^T \left\| \frac{\partial}{\partial \mathbf{u}^{(j)}} L_{f, \mathcal{D}}(h^{(t)}) \right\| \leq c\eta T \sqrt{q}$$

Now, we have that:

$$\frac{\partial}{\partial W} L_{f, \mathcal{D}}(h^{(t)}) = \mathbb{E}_{\mathbf{x} \sim \mathcal{D}} \left[ \sum_{j=1}^{n-k} \mathbf{u}^{(t,j)} \mathbf{x}_{j \dots j+k-1}^\top \sigma'(W^{(t)} \mathbf{x}_{j \dots j+k-1} + b) \ell'(h^{(t)}(\mathbf{x}), f(\mathbf{x})) \right]$$

And so:

$$\left\| \frac{\partial}{\partial W} L_{f, \mathcal{D}}(h^{(t)}) \right\| \leq \mathbb{E}_{\mathbf{x} \sim \mathcal{D}} \left[ \sum_{j=1}^{n-k} \left\| \mathbf{u}^{(t,j)} \right\| \left\| \mathbf{x}_{j \dots j+k-1} \right\| \right] \leq c(n-k)\eta T \sqrt{q} \sqrt{k}$$

Again, by the updates of gradient-descent:

$$\left\| W^{(T)} - W^{(0)} \right\| = \left\| \eta \sum_{t=1}^T \frac{\partial}{\partial W} L_{f, \mathcal{D}}(h^{(t)}) \right\| \leq \eta \sum_{t=1}^T \left\| \frac{\partial}{\partial W} L_{f, \mathcal{D}}(h^{(t)}) \right\| \leq c\eta^2 T^2 n \sqrt{qk}$$

□

*Proof of Lemma 9.*

$$\begin{aligned} & \left| L_{f, \mathcal{D}}(h_{\mathbf{u}^*, W^{(T)}, b}) - L_{f, \mathcal{D}}(h_{\mathbf{u}^*, W^{(0)}, b}) \right| \\ &= \left| \mathbb{E}_{\mathbf{x} \sim \mathcal{D}} [\ell(h_{\mathbf{u}^*, W^{(T)}, b}(\mathbf{x}), f(\mathbf{x}))] - \mathbb{E}_{\mathbf{x} \sim \mathcal{D}} [\ell(h_{\mathbf{u}^*, W^{(0)}, b}(\mathbf{x}), f(\mathbf{x}))] \right| \\ &\leq \mathbb{E}_{\mathbf{x} \sim \mathcal{D}} [|\ell(h_{\mathbf{u}^*, W^{(T)}, b}(\mathbf{x}), f(\mathbf{x})) - \ell(h_{\mathbf{u}^*, W^{(0)}, b}(\mathbf{x}), f(\mathbf{x}))|] \\ &\leq \mathbb{E}_{\mathbf{x} \sim \mathcal{D}} [|\ell(h_{\mathbf{u}^*, W^{(T)}, b}(\mathbf{x}), f(\mathbf{x})) - \ell(h_{\mathbf{u}^*, W^{(0)}, b}(\mathbf{x}), f(\mathbf{x}))|] \\ &= \mathbb{E}_{\mathbf{x} \sim \mathcal{D}} \left[ \left\| \sum_{j=1}^{n-k} \left\langle \mathbf{u}^{*(j)}, \sigma(W^{(T)} \mathbf{x}_{j \dots j+k-1} + \mathbf{b}) - \sigma(W^{(0)} \mathbf{x}_{j \dots j+k-1} + \mathbf{b}) \right\rangle \right\| \right] \\ &\leq \mathbb{E}_{\mathbf{x} \sim \mathcal{D}} \left[ \sum_{j=1}^{n-k} \left\| \mathbf{u}^{*(j)} \right\| \left\| \sigma(W^{(T)} \mathbf{x}_{j \dots j+k-1} + \mathbf{b}) - \sigma(W^{(0)} \mathbf{x}_{j \dots j+k-1} + \mathbf{b}) \right\| \right] \\ &\leq \mathbb{E}_{\mathbf{x} \sim \mathcal{D}} \left[ \sum_{j=1}^{n-k} \left\| \mathbf{u}^{*(j)} \right\| \left\| W^{(T)} - W^{(0)} \right\| \left\| \mathbf{x}_{j \dots j+k-1} \right\| \right] \leq c\eta^2 T^2 nk \sqrt{q} \sum_{j=1}^{n-k} \left\| \mathbf{u}^{*(j)} \right\| \end{aligned}$$

□

*Proof.* (second part of Theorem 12)

For some  $\pi$ , observe that:

$$\begin{aligned} \frac{\partial}{\partial u_i} L_{\chi_{\pi(I)}, \mathcal{D}}(h_{\mathbf{u}, \mathbf{w}, \mathbf{b}}) &= - \mathbb{E}_{\mathbf{x} \sim \mathcal{D}} \left[ \sigma \left( \langle \mathbf{w}^{(i)}, \mathbf{x} \rangle + b_i \right) \chi_I(\pi(\mathbf{x})) \right] \\ &= - \mathbb{E}_{\mathbf{x} \sim \mathcal{D}} \left[ \sigma \left( \langle \pi(\mathbf{w}^{(i)}), \mathbf{x} \rangle + b_i \right) \chi_I(\mathbf{x}) \right] = \frac{\partial}{\partial u_i} L_{\chi_I, \mathcal{D}}(\pi(h_{\mathbf{u}, \mathbf{w}, \mathbf{b}})) \end{aligned}$$

Let  $S$  be a maximal set of permutations such that for every  $\pi_1 \neq \pi_2 \in S$  we have  $\pi_1(I) \neq \pi_2(I)$ , and note that  $|S| = \binom{n}{k}$ . Let  $g_i(\mathbf{x}) = \sigma(\langle \mathbf{w}^{(i)}, \mathbf{x} \rangle + b_i)$  and note that  $\|g_i\|_{\mathcal{D}}^2 \leq c^2$ . Therefore:

$$\begin{aligned} \sum_{\pi \in S_j} \left( \frac{\partial}{\partial u_i} L_{\chi_I, \mathcal{D}}(\pi(h_{\mathbf{u}, \mathbf{w}, \mathbf{b}})) \right)^2 &= \sum_{\pi \in S} \left( \frac{\partial}{\partial u_i} L_{\chi_{\pi(I)}, \mathcal{D}}(h_{\mathbf{u}, \mathbf{w}, \mathbf{b}}) \right)^2 \\ &= \sum_{\pi \in S} \langle g_i, \chi_{\pi(I)} \rangle_{\mathcal{D}}^2 \leq \sum_{I' \subseteq [n]} \langle g_i, \chi_{I'} \rangle_{\mathcal{D}}^2 = \|g_i\|_{\mathcal{D}}^2 \leq c^2 \end{aligned}$$

And therefore:

$$\mathbb{E}_{\mathbf{w} \sim \mathcal{W}} \left\| \frac{\partial}{\partial \mathbf{u}} L_{\chi_I, \mathcal{D}}(h_{\mathbf{u}, \mathbf{w}, \mathbf{b}}) \right\|_2^2 = \mathbb{E}_{\mathbf{w} \sim \mathcal{W}} \mathbb{E}_{\pi \sim S} \left\| \frac{\partial}{\partial \mathbf{u}} L_{\chi_I, \mathcal{D}}(\pi(h_{\mathbf{u}, \mathbf{w}, \mathbf{b}})) \right\|_2^2 \leq c^2 q \binom{n}{k}^{-1}$$

□
